# Supplementary material for: Improvements in hematologic markers and decreases in fatigue with pegcetacoplan for patients with paroxysmal nocturnal hemoglobinuria and mild or moderate anemia (hemoglobin ≥10 g/dL) who had received eculizumab or were naive to complement inhibitors
Source: PubMed Central journal article supplement (PMC11285951; doi:10.1371/journal.pone.0306407), 2024-07-29
Supplement: pone.0306407.s004.pdf [file pone.0306407.s004.pdf]

**16.1.5 SIGNATURES INVESTIGATORS**

**PRINCIPAL OR COORDINATING  
INVESTIGATOR(S) SIGNATURE(S)  
OR SPONSOR’S RESPONSIBLE MEDICAL OFFICER**

**STUDY TITLE:** APL2-308 (PRINCE)  
A Phase 3, Randomized, Multicenter, Open-Label,  
Controlled Study to Evaluate the Efficacy and Safety of  
Pegcetacoplan in Patients with Paroxysmal Nocturnal  
Hemoglobinuria (PNH)

**STUDY AUTHOR(S):** Apellis Pharmaceuticals, Inc.

I have read this report and confirm that to the best of my knowledge it accurately describes the  
conduct and results of the study

**INVESTIGATOR OR SPONSOR’S RESPONSIBLE MEDICAL OFFICER:**

Dr. Raymond wong

The Chinese University of Hong Kong

Raymond wong

(Printed Name, Affiliation)

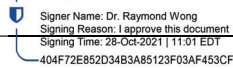  
Signer Name: Dr. Raymond Wong  
Signing Reason: I approve this document  
Signing Time: 28-Oct-2021 | 11:01 EDT  
404F72E852D34B3A85123F03AF453CF1

(Signature)

28-Oct-2021 | 11:01 EDT

(Date)
