# Supplementary material for: Improvements in hematologic markers and decreases in fatigue with pegcetacoplan for patients with paroxysmal nocturnal hemoglobinuria and mild or moderate anemia (hemoglobin ≥10 g/dL) who had received eculizumab or were naive to complement inhibitors
Source: PubMed Central journal article supplement (PMC11285951; doi:10.1371/journal.pone.0306407), 2024-07-29
Supplement: pone.0306407.s006.pdf [file pone.0306407.s006.pdf]

## Supplement

**Improvements in hematologic markers and decreases in fatigue with pegcetacoplan for patients with paroxysmal nocturnal hemoglobinuria and mild or moderate anemia (hemoglobin  $\geq 10$  g/dL) who had received eculizumab or were naive to complement inhibitors**

Jens Panse, MD<sup>1,2\*</sup>, Nicolas Daguindau, MD<sup>3</sup>, Sonia Okuyama, MD<sup>4</sup>, Régis Peffault de Latour, MD, PhD<sup>5</sup>, Philippe Schafhausen, MD<sup>6</sup>, Nicole Straetmans, MD, PhD<sup>7</sup>, Mohammed Al-Adhami, PhD<sup>8</sup>, Emmelie Persson, PhD<sup>9</sup>, Raymond Siu Ming Wong, MBChB, MD<sup>10</sup>

<sup>1</sup>Department of Hematology, Oncology, Hemostaseology and Stem Cell Transplantation, University Hospital RWTH Aachen, Aachen, Germany; <sup>2</sup>Center for Integrated Oncology (CIO), Aachen, Bonn, Cologne, Dusseldorf (ABCD), Germany; <sup>3</sup>Centre Hospitalier Annecy Genevois, Épagny-Metz-Tessy, France; <sup>4</sup>Hematology/Oncology Division, Denver Health and Hospital Authority, Denver, CO, USA; <sup>5</sup>French Reference Center for Aplastic Anemia and Paroxysmal Nocturnal Hemoglobinuria, Assistance Publique - Hôpitaux de Paris; Université de Paris, Paris, France; <sup>6</sup>Department of Oncology, Hematology, and Bone Marrow Transplantation with Section of Pneumology, University Medical Center Hamburg-Eppendorf, Hamburg; <sup>7</sup>Department of Hematology, Cliniques Universitaires Saint-Luc, Woluwe-Saint-Lambert, Belgium; <sup>8</sup>Apellis Pharmaceuticals, Waltham, MA, USA; <sup>9</sup>Swedish Orphan Biovitrum AB, Stockholm, Sweden; <sup>10</sup>Sir Y.K. Pao Centre for Cancer & Department of Medicine and Therapeutics, Prince of Wales Hospital, The Chinese University of Hong Kong, Hong Kong

## Table of Contents

|                                                                                                                                                                                                                   |   |
|-------------------------------------------------------------------------------------------------------------------------------------------------------------------------------------------------------------------|---|
| <b>S1 Table.</b> De-identified patient data .....                                                                                                                                                                 | 3 |
| <b>S1 Fig A.</b> Hemoglobin concentrations (baseline vs. 16 weeks of pegcetacoplan) for patients with PNH and mild/moderate anemia (hemoglobin $\geq 10$ g/dL) in the PADDOCK, PRINCE, and PEGASUS trials.....    | 4 |
| <b>S1 Fig B.</b> ARCs (baseline vs. 16 weeks of pegcetacoplan) for patients with PNH and mild/moderate anemia (hemoglobin $\geq 10$ g/dL) in the PADDOCK, PRINCE, and PEGASUS trials.....                         | 5 |
| <b>S1 Fig C.</b> LDH concentrations (baseline vs. 16 weeks of pegcetacoplan) for patients with PNH and mild/moderate anemia (hemoglobin $\geq 10$ g/dL) in the PADDOCK, PRINCE, and PEGASUS trials.....           | 6 |
| <b>S1 Fig D.</b> FACIT-Fatigue score analysis (baseline vs. 16 weeks of pegcetacoplan) for patients with PNH and mild/moderate anemia (hemoglobin $\geq 10$ g/dL) in the PADDOCK, PRINCE, and PEGASUS trials..... | 7 |
| <b>Supplement reference</b> .....                                                                                                                                                                                 | 8 |

S1 Table. De-identified patient data.

| #  | Trial   | Sex | Transfusion | Hb-BL | Hb-W2 | Hb-W4 | Hb-W6 | Hb-W8 | Hb-W12 | Hb-W16 | ARC-BL | ARC-W2 | ARC-W4 | ARC-W6 | ARC-W8 | ARC-W12 | ARC-W16 | LDH-BL | LDH-W2 | LDH-W4 | LDH-W6 | LDH-W8 | LDH-W12 | LDH-W16 | FACIT-F-BL | FACIT-F-W2 | FACIT-F-W4 | FACIT-F-W6 | FACIT-F-W8 | FACIT-F-W12 | FACIT-F-W16 |
|----|---------|-----|-------------|-------|-------|-------|-------|-------|--------|--------|--------|--------|--------|--------|--------|---------|---------|--------|--------|--------|--------|--------|---------|---------|------------|------------|------------|------------|------------|-------------|-------------|
| 1  | PADDOCK | M   | NA*         | 11.0  | 11.4  | 11.9  | NA    | NA    | NA     | NA     | 192    | 96     | 89     | NA     | NA     | NA      | NA      | 1681   | 251    | 175    | NA     | NA     | NA      | NA      | 27         | 40         | 47         | NA         | NA         | NA          | NA          |
| 2  | PADDOCK | F   | N           | 10.0  | 11.6  | 12.2  | 12.6  | 11.9  | 12.5   | 11.4   | 123    | 232    | 100    | 98     | 112    | 135     | 164     | 2989   | 348    | 222    | 226    | 278    | 335     | 338     | 34         | 29         | 32         | 39         | NA         | 37          | 38          |
| 3  | PADDOCK | F   | N           | 10.1  | 11.7  | 12.9  | 13.1  | 13.5  | 12.4   | 12.7   | 322    | 106    | 88     | 76     | 78     | NA      | 110     | 2301   | 287    | 239    | 191    | 221    | 235     | 209     | 46         | 41         | 46         | 45         | NA         | 43          | 48          |
| 4  | PADDOCK | M   | N           | 10.8  | 12.2  | 12.8  | 13.3  | NA    | 13.2   | 13.5   | 183    | 57     | 40     | 45     | NA     | 77      | 108     | 1579   | 184    | 140    | 128    | NA     | 179     | 198     | 28         | 44         | 36         | 40         | NA         | 43          | 43          |
| 5  | PADDOCK | F   | N           | 10.8  | 11.8  | 11.3  | 11.3  | 11.6  | 11.4   | 11.9   | 138    | 56     | 66     | 69     | 80     | 86      | 87      | 1199   | 205    | 128    | 162    | 151    | 188     | 223     | 43         | 47         | 45         | 47         | NA         | 46          | 46          |
| 6  | PADDOCK | M   | N           | 10.4  | 12    | 12.4  | 13.1  | 13.2  | 13.8   | 14.2   | 235    | 122    | 110    | 95     | 100    | 117     | 109     | 1866   | 260    | 179    | 180    | 190    | 280     | 246     | 42         | 42         | 44         | 49         | NA         | 51          | 51          |
| 7  | PRINCE  | M   | N           | 10.6  | 12.2  | 12    | 13.1  | 13.9  | 14.2   | 14.3   | 275    | 90     | 80     | 70     | 50     | 80      | 90      | 2260.5 | 190    | 99     | 120    | 120    | 148     | 196     | 44         | NA         | 36         | NA         | 51         | 52          | 49          |
| 8  | PRINCE  | M   | N           | 10.2  | 11.6  | 12.2  | 13.1  | 12.7  | 12.4   | 13.1   | 185    | 60     | 70     | 70     | 70     | 80      | NA      | 1534.5 | 248    | 151    | 147    | 151    | 167     | 179.5   | 49         | NA         | 50         | NA         | 43         | 40          | NA          |
| 9  | PRINCE  | M   | N           | 11.3  | NA    | 12.6  | 14.6  | 14    | 14.6   | 13.3   | 255    | NA     | NA     | NA     | NA     | NA      | 60      | 2201.5 | NA     | 181.4  | 251.5  | NA     | 181.4   | 121     | 28         | NA         | NA         | NA         | NA         | NA          | 46          |
| 10 | PRINCE  | F   | N           | 10.5  | 12.2  | 12.1  | 11.9  | 11.9  | 12.1   | 11.7   | 290    | 150    | 100    | 150    | 130    | 130     | 100     | 1390   | 165    | 141    | 171    | 221    | 215.7   | 208     | NA         | NA         | 45         | NA         | 42         | 50          | 50          |
| 11 | PRINCE  | M   | N           | 12    | 14.4  | 16    | 15.2  | 14.3  | 14.9   | 14.8   | 295    | 70     | 50     | 40     | 70     | 150     | 110     | 2677   | 209    | 149    | 157    | 170    | 212     | 149     | 39         | NA         | 45         | NA         | 44         | 44          | 47          |
| 12 | PRINCE  | M   | N           | 11.3  | 14.1  | 15.3  | 15.6  | 15.6  | 14.7   | 14.5   | 285    | 70     | 30     | 70     | 40     | 110     | 70      | 2777.5 | 260    | 150    | 154    | 167    | 211     | 213     | 19         | NA         | 29         | NA         | 30         | 24          | 31          |
| 13 | PRINCE  | F   | N           | 11.3  | 12.9  | 13.4  | 14.4  | 15.1  | 14.9   | 14.4   | 163.3  | 100    | 50     | 60     | 50     | 90      | 110     | 1409.5 | 283    | 155    | 144    | 149    | 192     | 219     | 39         | NA         | 51         | NA         | 50         | 49          | 51          |
| 14 | PRINCE  | M   | N           | 13.1  | 12.2  | 13.2  | 13.6  | NA    | 15.1   | 16.1   | 180    | 70     | 60     | 50     | NA     | NA      | NA      | 2974   | 157    | 120    | 132    | 157    | 182     | 175.9   | 26         | NA         | 47         | NA         | 51         | 49          | 50          |
| 15 | PEGASUS | F   | Y           | 10.3  | 12.2  | 11.8  | 12.2  | NA    | 12.9   | 6.0    | 190    | 160    | 170    | 110    | NA     | NA      | NA      | 258    | 149    | 535    | 393    | NA     | 180     | NA      | 31         | 42         | 41         | 48         | NA         | 39          | NA          |
| 16 | PEGASUS | F   | N           | 10.0  | 11.4  | 11.6  | 11.1  | 11.3  | 11.6   | 11.4   | 160    | 60     | 80     | 80     | 80     | 70      | 50      | 227.5  | 177    | 195    | 186    | 187    | 206     | 199     | 19         | 37         | 32         | 35         | 31         | 38          | 44          |
| 17 | PEGASUS | F   | N           | 10.2  | 14.2  | 14.1  | 13.9  | 13.1  | 13.6   | 13.9   | 205    | 20     | 30     | 30     | 60     | 70      | 50      | 171    | 119    | 122    | 121    | 166    | 115     | 111     | 30         | 46         | 48         | 35         | 48         | 42          | 39          |
| 18 | PEGASUS | M   | N           | 10.1  | 12    | 12.8  | 13.4  | 13.3  | 13.3   | 13.4   | 390    | 80     | 50     | 100    | 90     | 100     | 100     | 211    | 130    | 115    | 146    | 145    | 161     | 169     | 36         | 47         | 49         | 51         | 51         | 51          | 51          |
| 19 | PEGASUS | F   | N           | 10.0  | 13.1  | 12.8  | 13.3  | 12.8  | 12.5   | 12.3   | 260    | 80     | 110    | 120    | 70     | 120     | 100     | 180.5  | 127    | 141    | 136    | 157    | 138     | 156     | 16         | 40         | 38         | 36         | 45         | 42          | 44          |
| 20 | PEGASUS | M   | N           | 10.8  | 15.2  | 14.4  | 14.8  | 14.8  | 14.7   | 14.4   | 420    | 120    | 150    | 130    | 120    | 110     | 100     | 286    | 229    | 231    | 189    | 211    | 199     | 190     | 19         | 39         | 35         | 37         | 39         | 44          | 42          |
| 21 | PEGASUS | M   | N           | 10.1  | 14    | 14.1  | 13.5  | 14    | 14.4   | 14.4   | 290    | 80     | 100    | 70     | 70     | 70      | 80      | 194.5  | 154    | 177    | 174    | 177    | 157     | 159     | 29         | 40         | 37         | 39         | 40         | 43          | 42          |
| 22 | PEGASUS | M   | Y           | 10.0  | 13.9  | 6.6   | NA    | NA    | NA     | NA     | 350    | 50     | NA     | NA     | NA     | NA      | NA      | 210    | 113    | NA     | NA     | NA     | NA      | NA      | NA         | NA         | NA         | 9          | NA         | NA          |             |
| 23 | PEGASUS | F   | N           | 10.4  | 13.2  | 12.9  | 12.6  | 11.1  | 12.3   | 13.2   | 250    | 40     | 60     | 40     | 80     | 100     | 70      | 132.7  | 74     | 76     | 75     | 70     | 90      | 86      | 18         | 38         | 27         | 13         | 31         | 33          | 27          |
| 24 | PEGASUS | F   | N           | 10.2  | 12.4  | 13.8  | 14.4  | 13.2  | 14.1   | 13.3   | 200    | 50     | 30     | 60     | 40     | 70      | 80      | 204    | 639    | 161    | 149    | 166    | 191     | 175     | 41         | 43         | 51         | 50         | 52         | 52          | 52          |
| 25 | PEGASUS | M   | N           | 10.1  | 14.6  | 16.1  | 15.6  | 15.7  | 15.3   | 15.3   | 200    | 70     | 90     | 70     | 110    | 110     | 110     | 155    | 117    | 112    | 171    | 143    | 141     | 149     | 34         | 36         | 44         | 24         | 43         | 42          | 43          |

ARC, absolute reticulocyte count; BL, baseline; F, female; FACIT-F, Functional Assessment of Chronic Illness Therapy-Fatigue; Hb, hemoglobin; LDH, lactate dehydrogenase; M, male; NA, not available; W, week.

\*This patient was excluded from normalization analysis.

**S1 Fig A. Hemoglobin concentrations (baseline vs. 16 weeks of pegcetacoplan) for patients with PNH and mild/moderate anemia (hemoglobin  $\geq 10$  g/dL) in the PADDOCK, PRINCE, and PEGASUS**

**trials.** The top and bottom edges of the boxes indicate the upper and lower values of the range for patients in this analysis. Horizontal black lines in the boxes indicate mean values of the patients in this analysis, and the diamonds indicate the mean value for all pegcetacoplan-treated patients in each study. Individual values for patients in this study are shown by circles.

LLN, lower limit of normal; PNH, paroxysmal nocturnal hemoglobinuria.

<sup>a</sup>This analysis was performed using week 16 as the baseline for patients who received eculizumab.

<sup>b</sup>Data are missing for 1 patient who stopped dosing at day 29 and left the study per physician decision.

<sup>c</sup>Excludes 1 patient with missing data at this timepoint. This patient discontinued after week 8 of the randomized controlled period

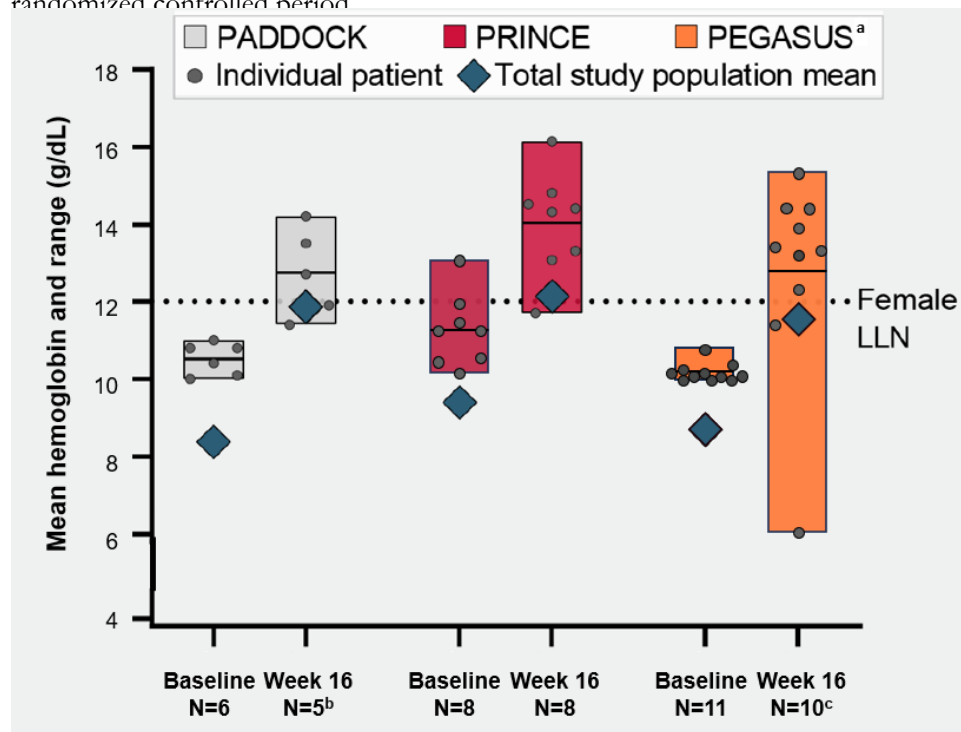

**S1 Fig B. ARCs (baseline vs. 16 weeks of pegcetacoplan) for patients with PNH and mild/moderate anemia (hemoglobin  $\geq 10$  g/dL) in the PADDOCK, PRINCE, and PEGASUS trials.** The top and bottom edges of the boxes indicate the upper and lower values of the range for patients in this analysis. Horizontal black lines in the boxes indicate mean values of the patients in this analysis, and the diamonds indicate the mean value for all pegcetacoplan-treated patients in each study. Individual values for patients in this study are shown by circles.

ARC, absolute reticulocyte count; LLN, lower limit of normal; PNH, paroxysmal nocturnal hemoglobinuria; ULN, upper limit of normal.

<sup>a</sup>This analysis was performed using week 16 as the baseline for patients who received eculizumab.

<sup>b</sup>Data are missing for 1 patient who stopped dosing at day 29 and left the study per physician decision.

<sup>c</sup>Excludes 2 patients with missing ARC data at this timepoint.

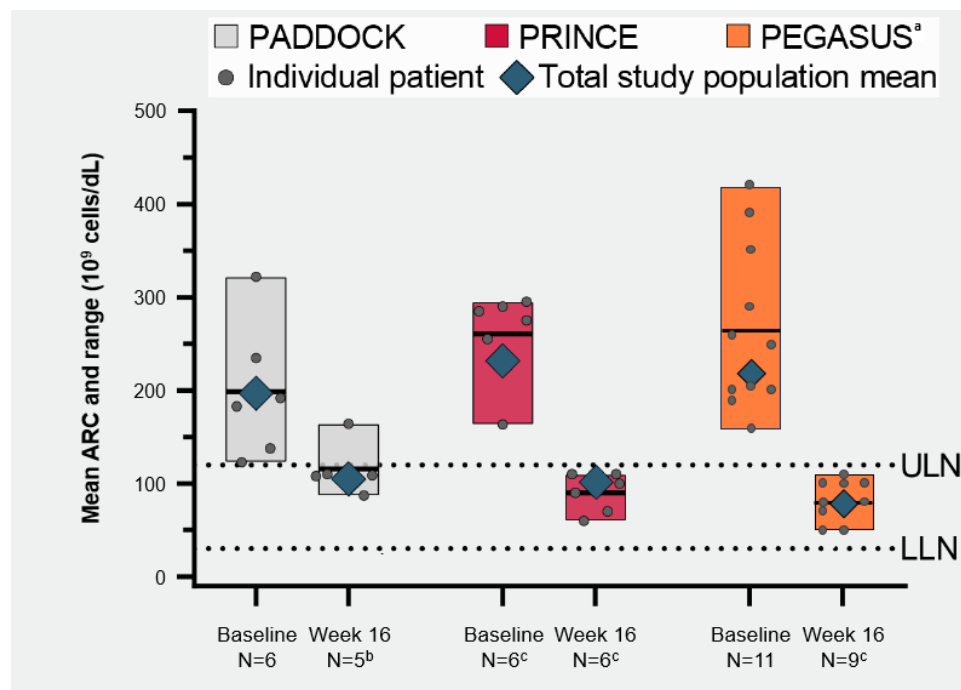

**S1 Fig C. LDH concentrations (baseline vs. 16 weeks of pegcetacoplan) for patients with PNH and mild/moderate anemia (hemoglobin  $\geq 10$  g/dL) in the PADDOCK, PRINCE, and PEGASUS trials.**

The top and bottom edges of the boxes indicate the upper and lower values of the range for patients in this analysis. Horizontal black lines in the boxes indicate mean values of the patients in this analysis, and the diamonds indicate the mean value for all pegcetacoplan-treated patients in each study. Individual values for patients in this study are shown by circles.

LDH, lactate dehydrogenase; LLN, lower limit of normal; PNH, paroxysmal nocturnal hemoglobinuria; ULN, upper limit of normal.

<sup>a</sup>This analysis was performed using week 16 as the baseline for patients who received eculizumab.

<sup>b</sup>Data are missing for 1 patient who stopped dosing at day 29 and left the study per physician decision.

<sup>c</sup>Excludes 2 patients with missing data at this timepoint.

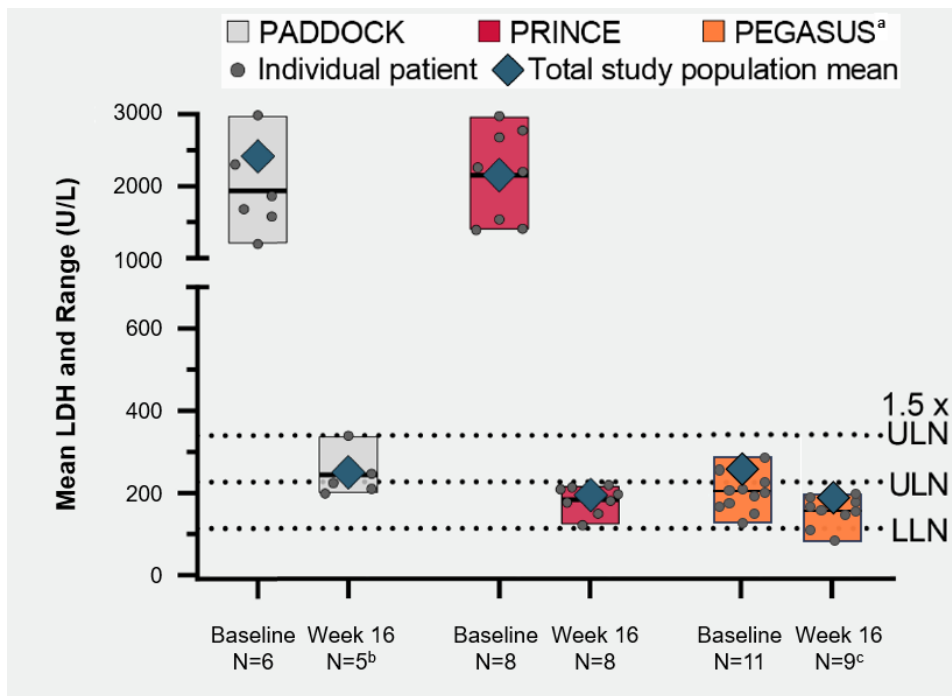

**S1 Fig D. FACIT-Fatigue score analysis (baseline vs. 16 weeks of pegcetacoplan) for patients with PNH and mild/moderate anemia (hemoglobin  $\geq 10$  g/dL) in the PADDOCK, PRINCE, and PEGASUS trials.** Mean FACIT-Fatigue scores at baseline and after 16 weeks of pegcetacoplan treatment are shown for patients with PNH and mild or moderate anemia (hemoglobin  $\geq 10.0$  g/dL) in the PADDOCK, PRINCE, and PEGASUS trials. The top and bottom edges of the boxes indicate the upper and lower values of the range for patients in this analysis. Horizontal black lines in the boxes indicate mean values of the patients in this analysis, and the diamonds indicate the mean value for all pegcetacoplan-treated patients in each study. Individual values for patients in this study are shown by circles.

FACIT-Fatigue, Functional Assessment of Chronic Illness Therapy-Fatigue; PNH, paroxysmal nocturnal hemoglobinuria.

<sup>a</sup>This analysis was performed using week 16 as the baseline for patients who received eculizumab.

<sup>b</sup>Defined by Cella et al [1].

<sup>c</sup>Data are missing for 1 patient who stopped dosing at day 29 and left the study per physician decision.

<sup>d</sup>Data were collected at day 141.

<sup>e</sup>Excludes 1 patient with missing FACIT-Fatigue data at this timepoint.

<sup>f</sup>Excludes 2 patients with missing FACIT-Fatigue data at this timepoint.

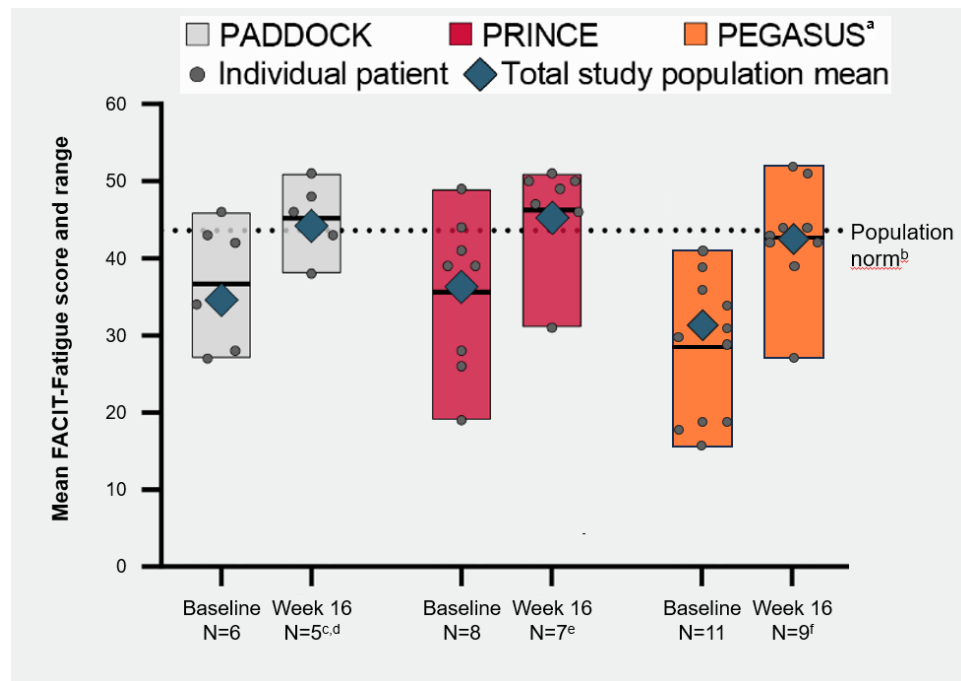

## **SUPPLEMENT REFERENCE**

1. Cella D, Lai J-S, Chang C-H, Peterman A, Slavin M. Fatigue in cancer patients compared with fatigue in the general United States population. *Cancer*. 2002;94(2): 528-538. doi: 10.1002/cncr.10245.
